# Supplementary material for: An evolutionary model identifies the main evolutionary biases for the evolution of genome-replication profiles
Source: eLife journal article supplement (doi:10.7554/elife.63542), 2021-05-20

A

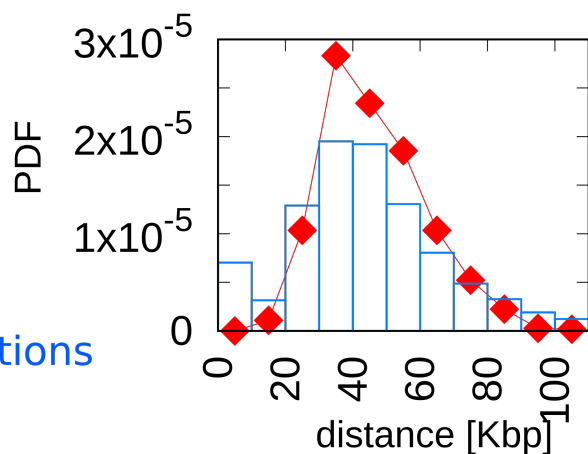

## Interference & double-stall aversion model (simulations)

Simulation: with border effect

Data analysis: all origins are taken into account

B

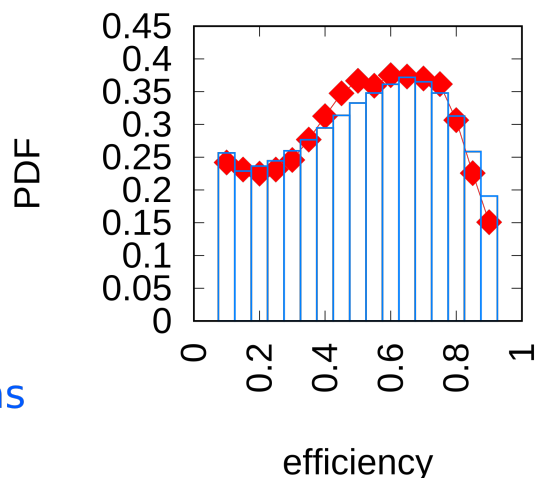

C

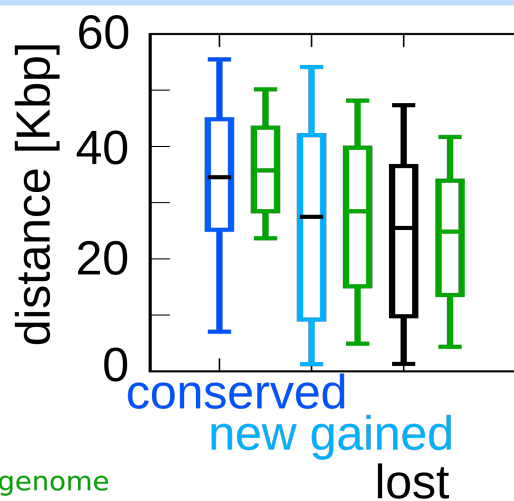

D

Expected results for uncorrelated events:  
73.14% cons 14.11% gain 12.74% lost

nearest to conserved

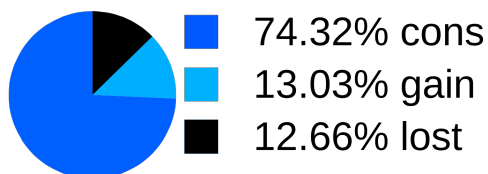

nearest to newly gained

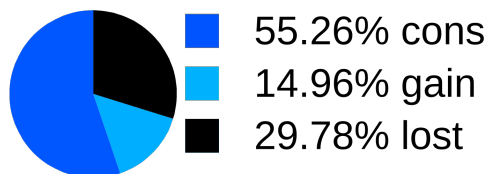

nearest to lost

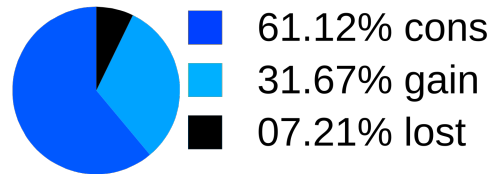

E

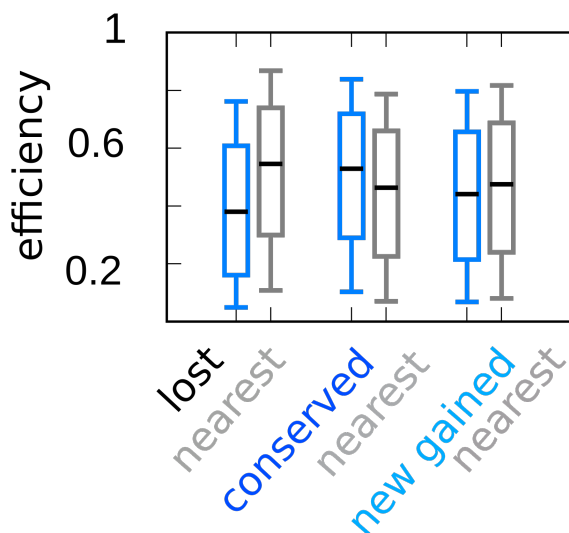

F

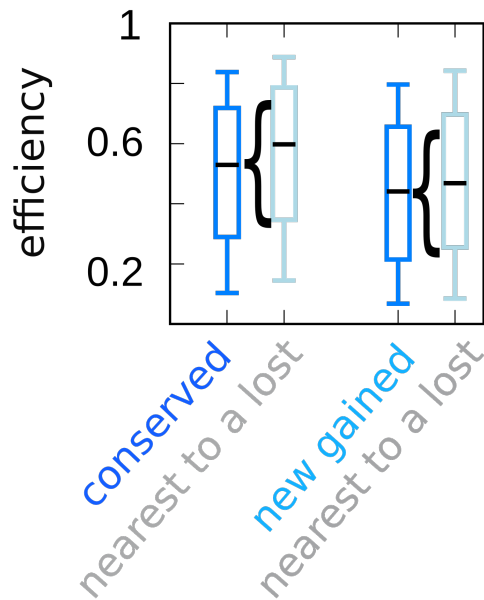

Supplement: supp [file elife-63542-supp-v1.zip]
