# Supplementary figures and images for: An evolutionary model identifies the main evolutionary biases for the evolution of genome-replication profiles
Source: eLife journal article supplement (doi:10.7554/elife.63542), 2021-05-20

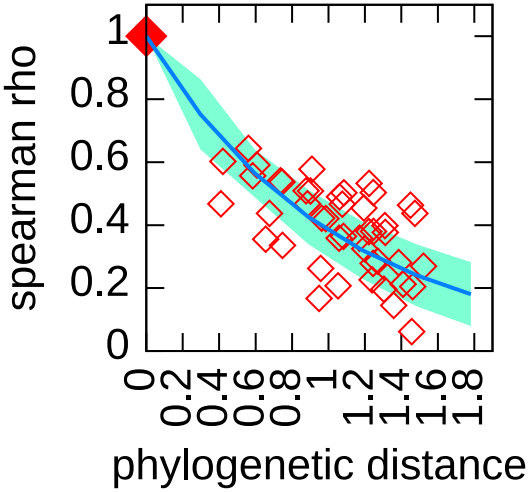

Supplement: supp [file elife-63542-supp-v1.zip]

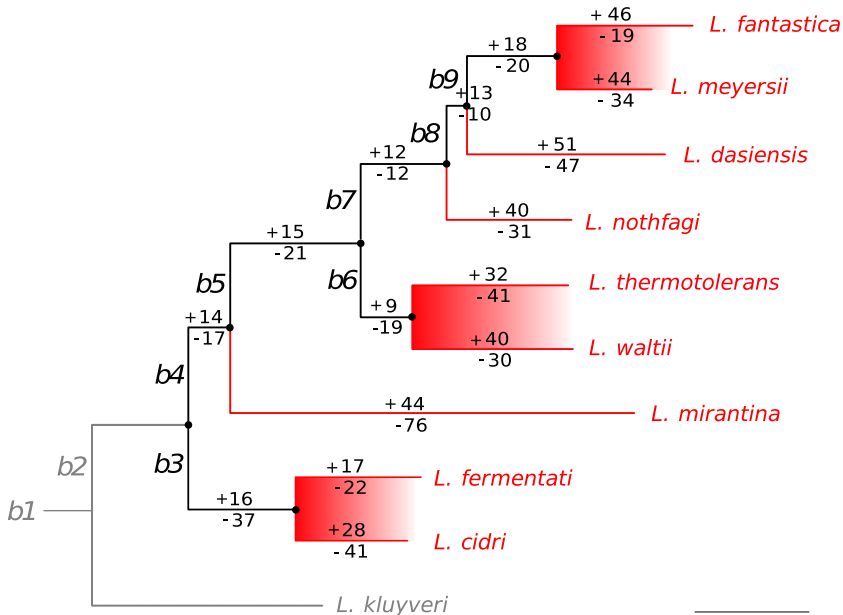

Supplement: supp [file elife-63542-supp-v1.zip]

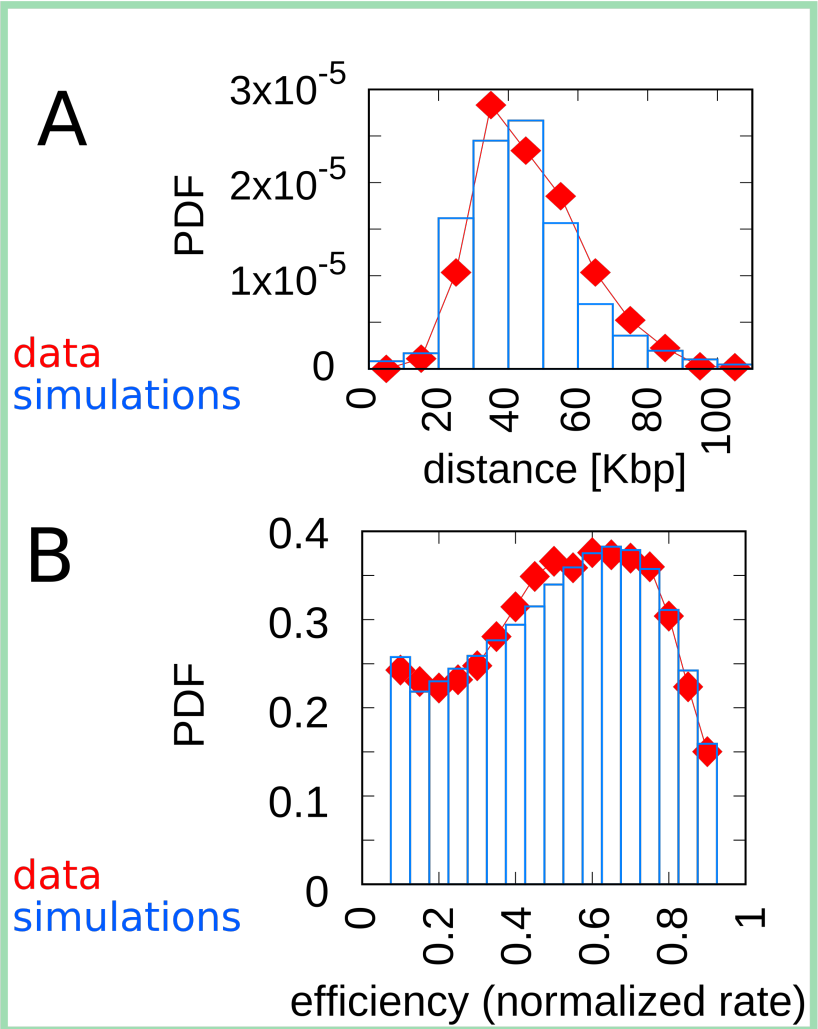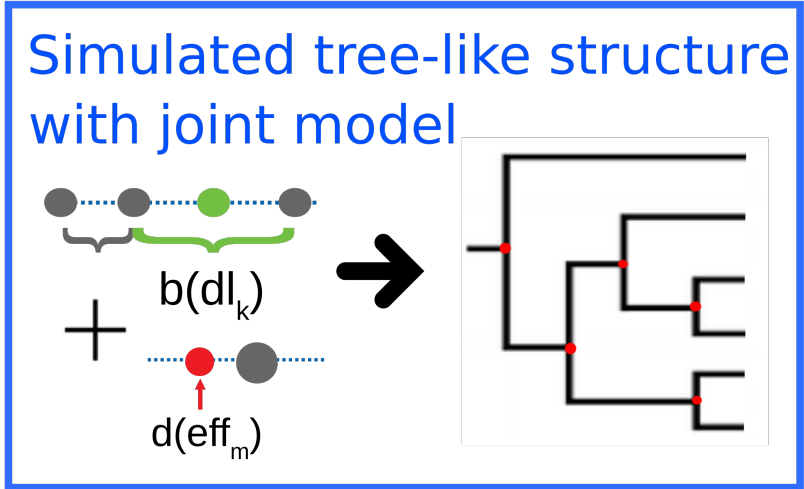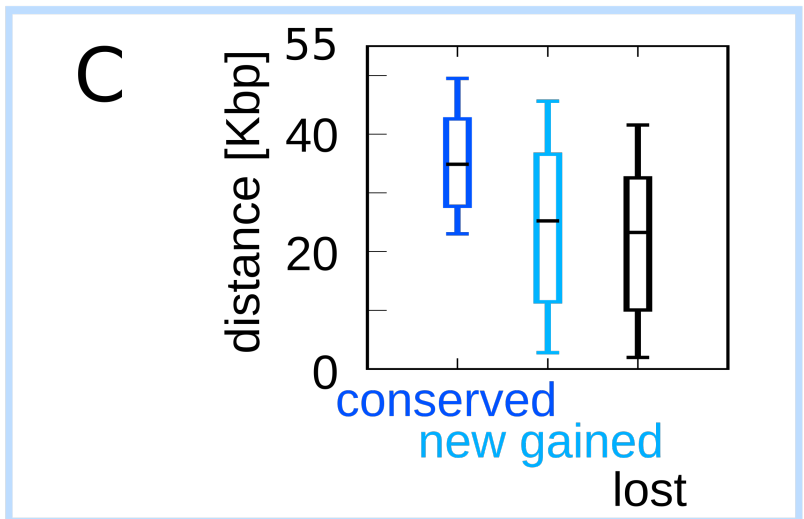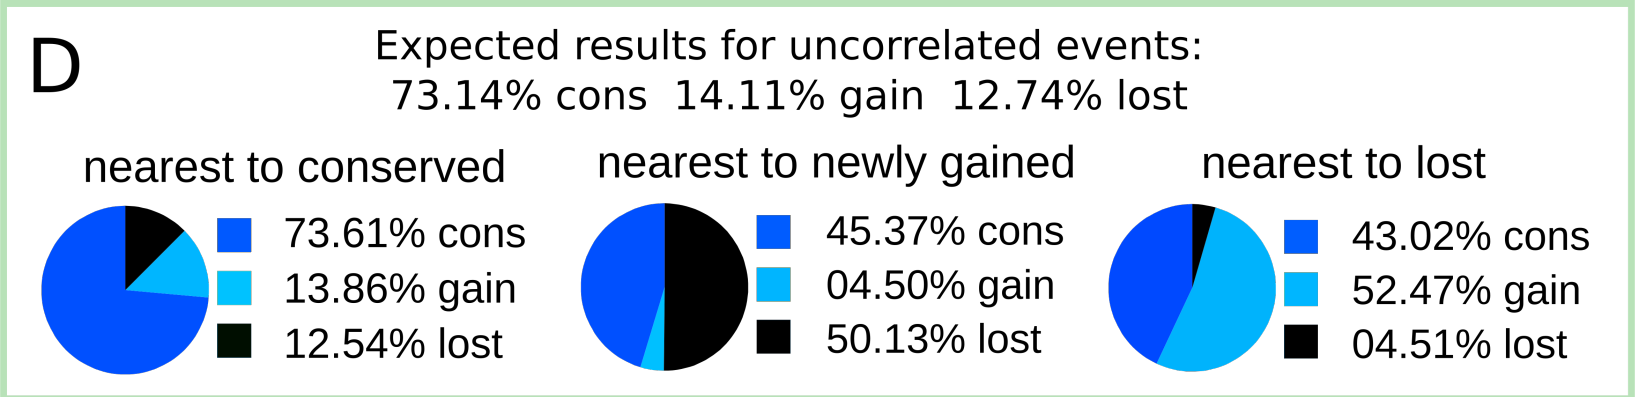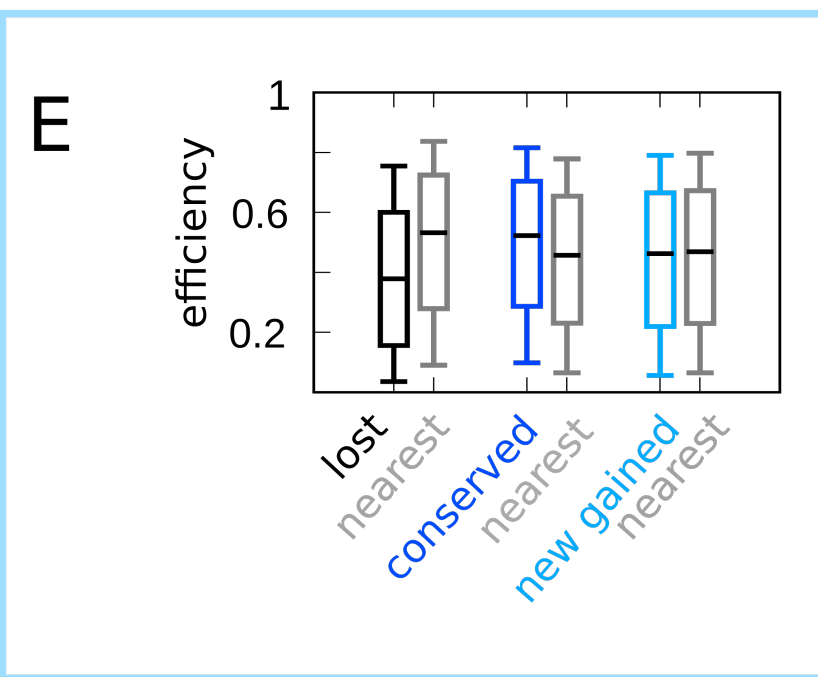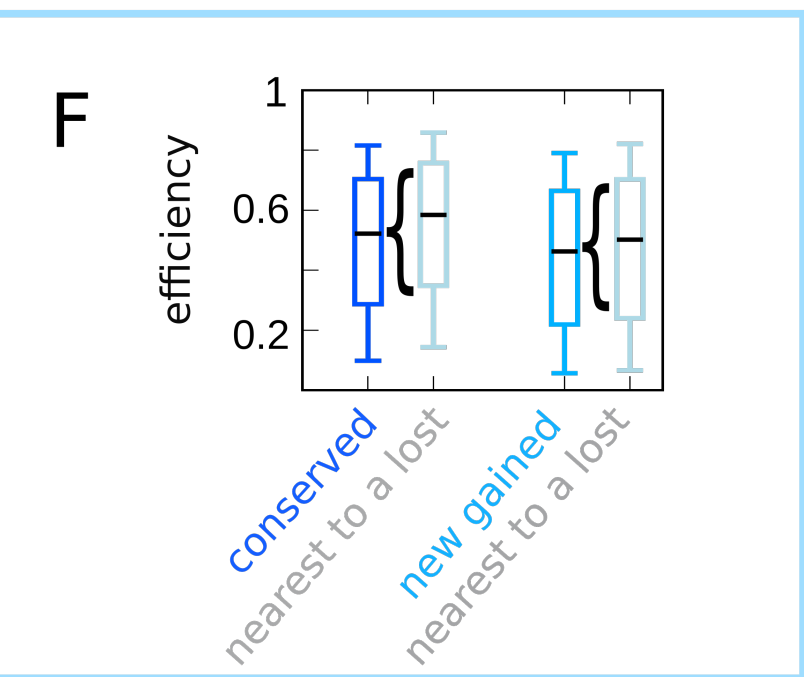

Supplement: supp [file elife-63542-supp-v1.zip]

PDF

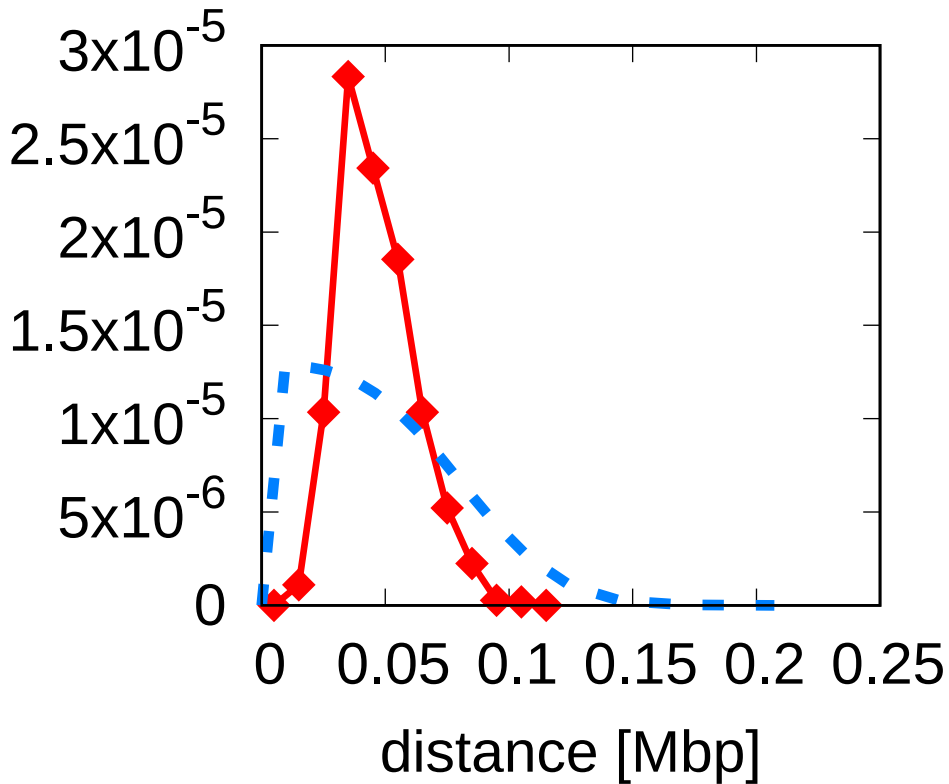

Supplement: supp [file elife-63542-supp-v1.zip]

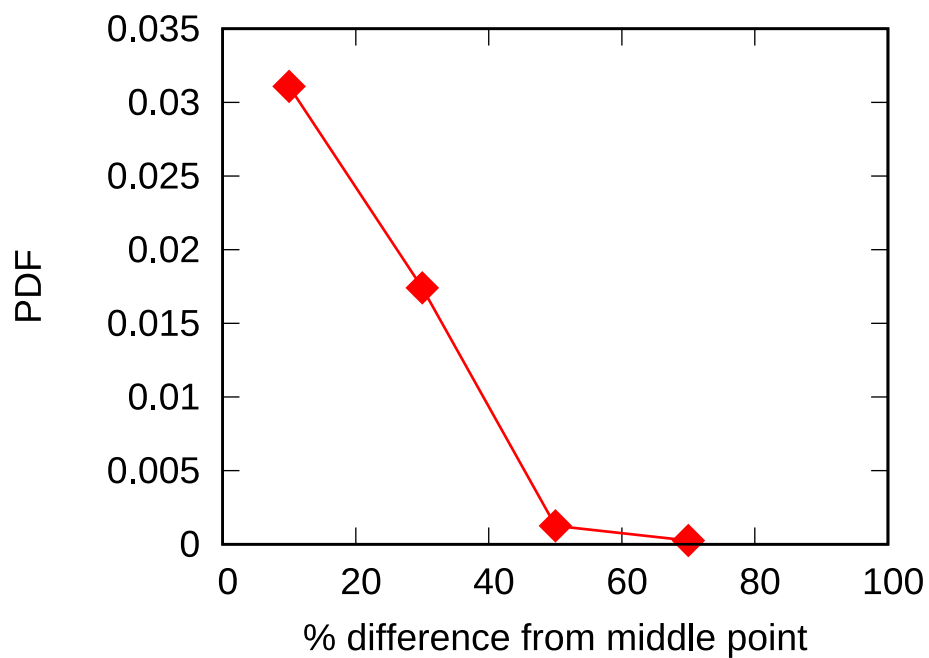

Supplement: supp [file elife-63542-supp-v1.zip]

**A**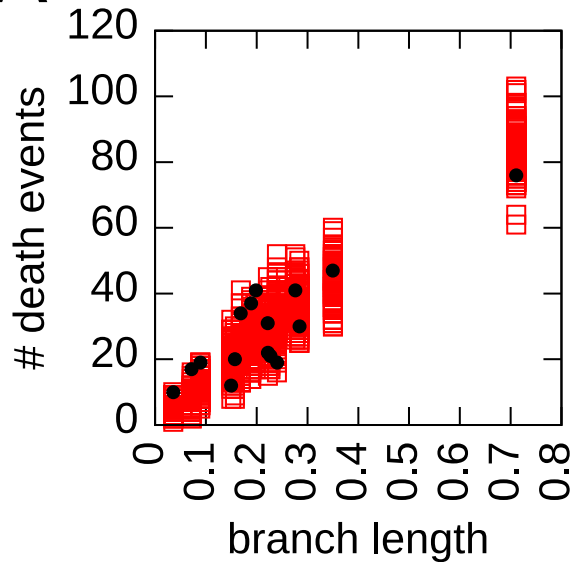**B**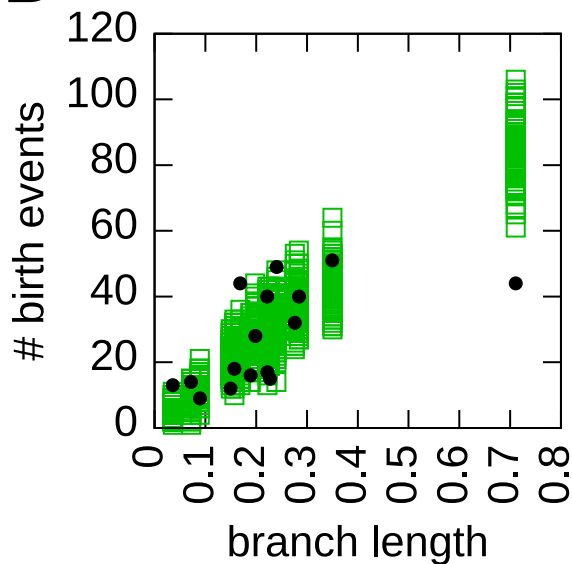

Supplement: supp [file elife-63542-supp-v1.zip]

DATA

firing rate

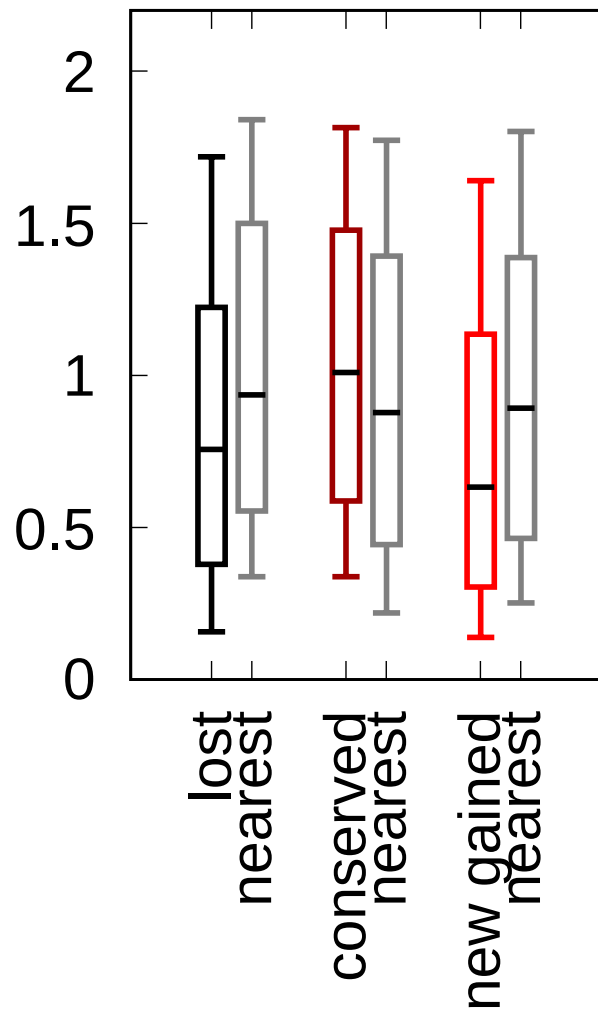

Double stall

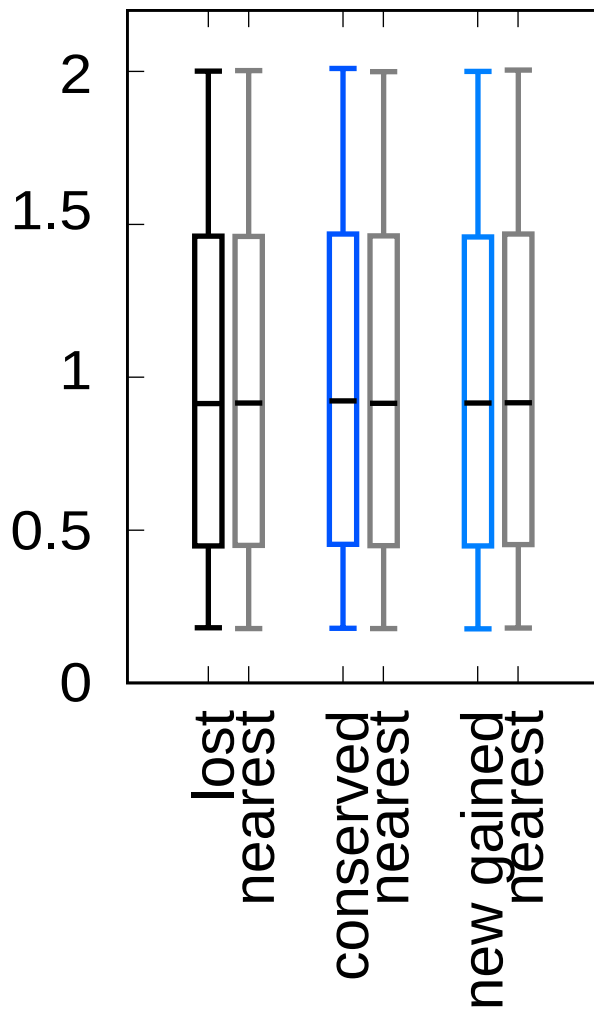

Joint

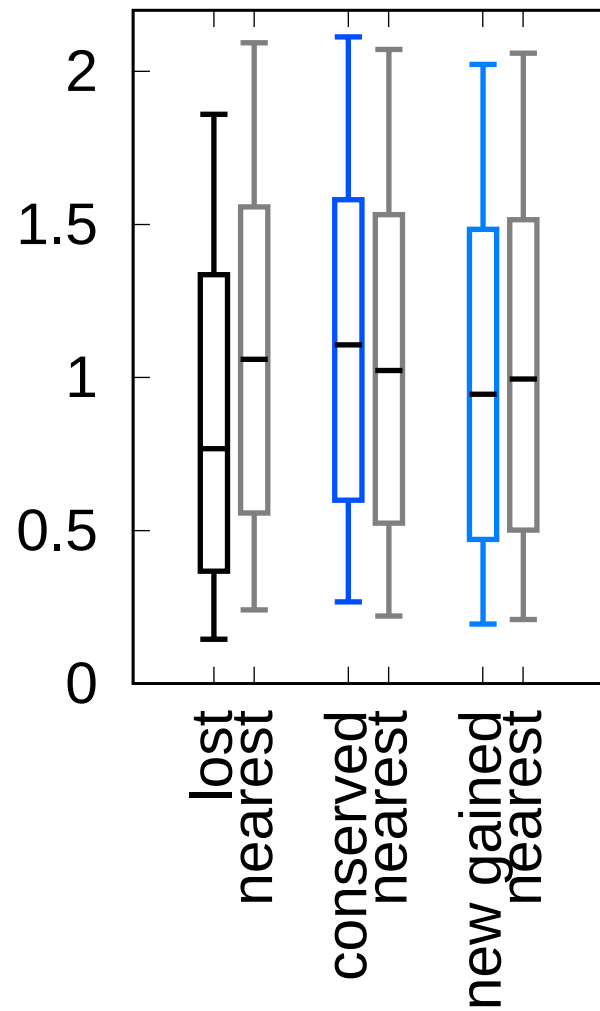

Supplement: supp [file elife-63542-supp-v1.zip]

**A**

spearman rho

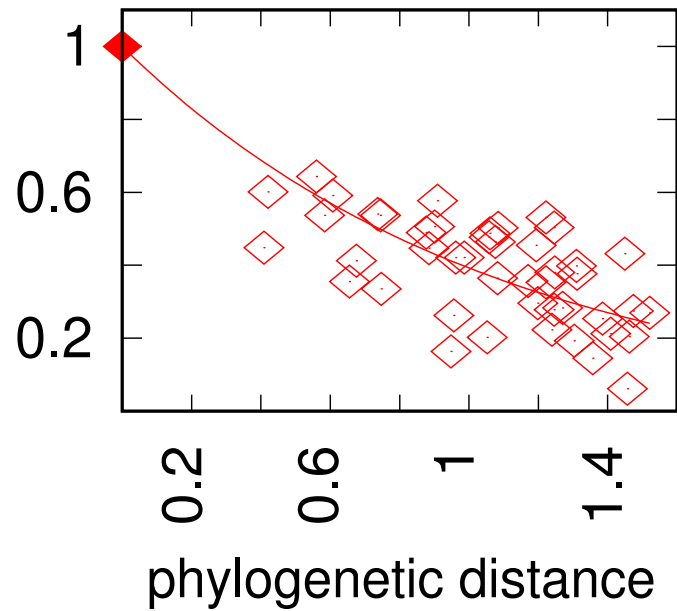**B**

Cumulative PDF

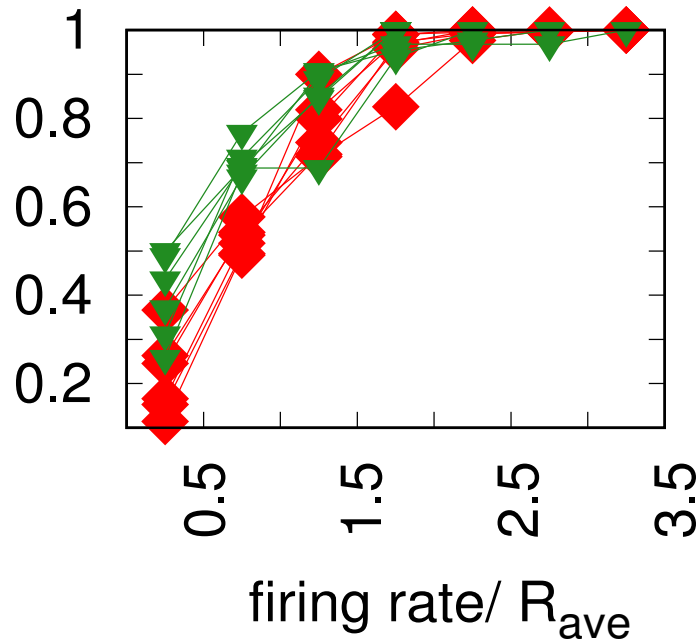

Supplement: supp [file elife-63542-supp-v1.zip]
